# Supplementary material for: How Socio-Environmental Factors Are Associated with Japanese Encephalitis in Shaanxi, China—A Bayesian Spatial Analysis
Source: PubMed Central journal article supplement (PMC5923650; doi:10.3390/ijerph15040608), 2018-03-27
Supplement: ijerph-15-00608-s001.pdf [file ijerph-15-00608-s001.pdf]

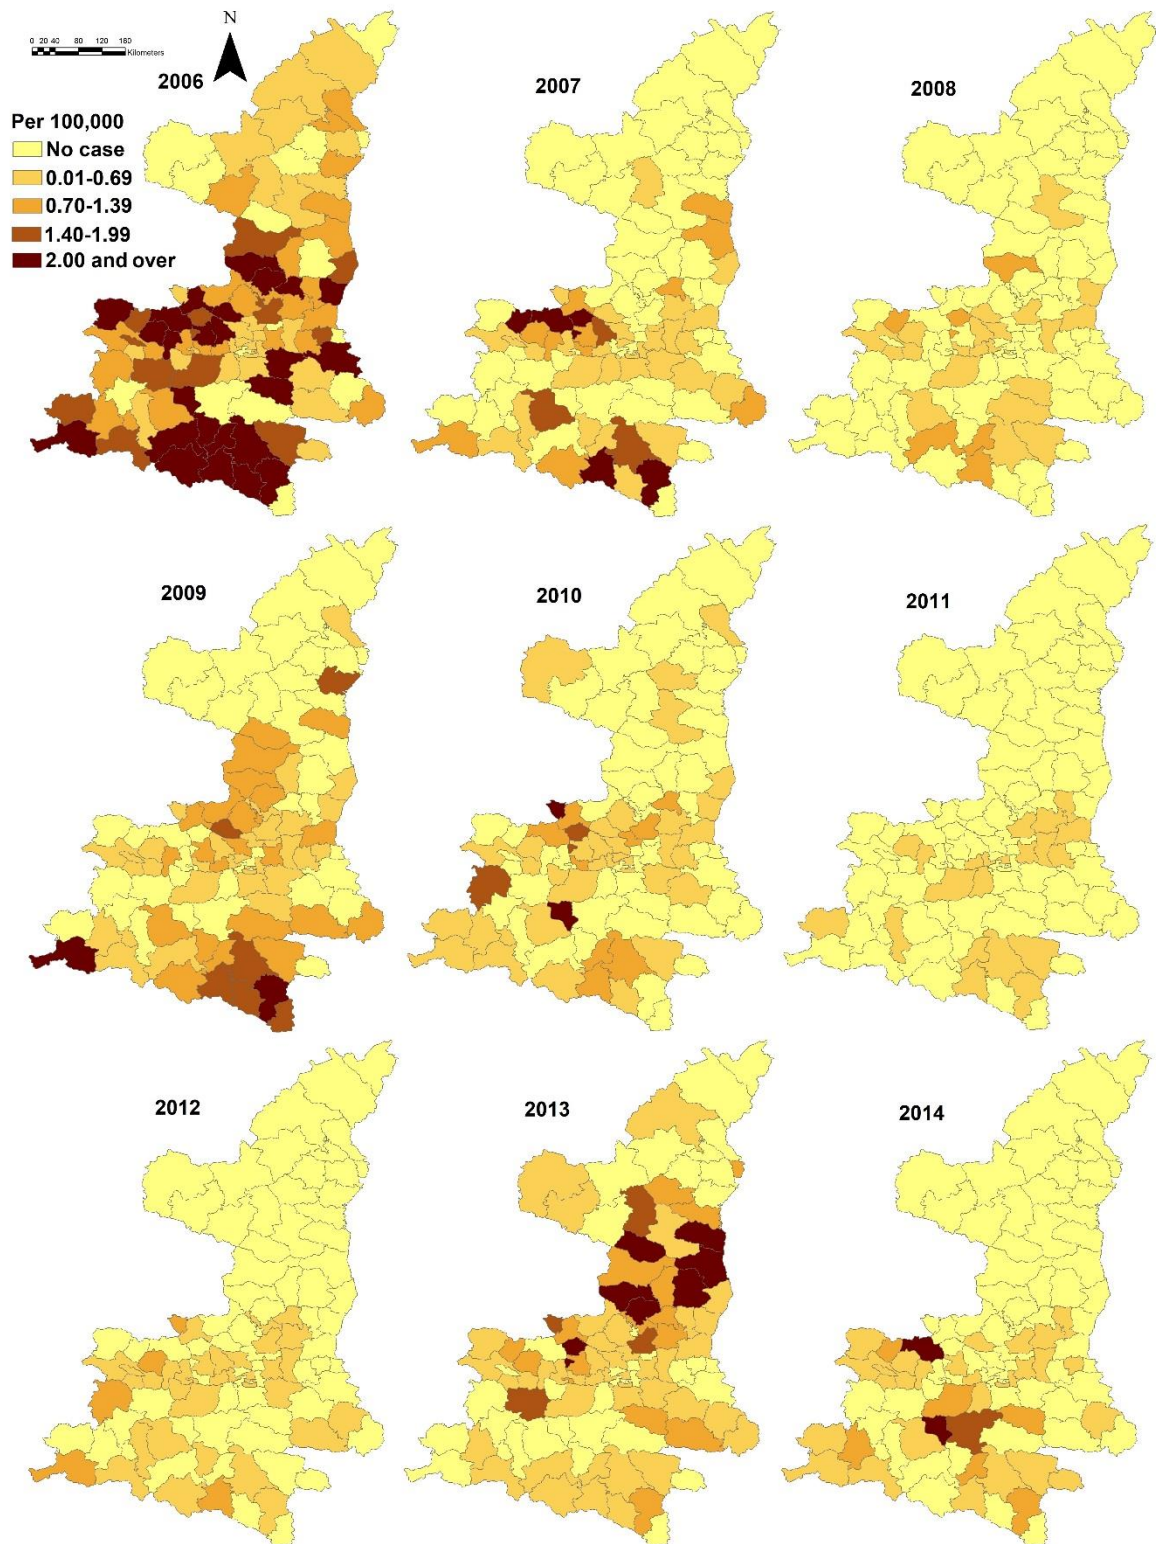

Figure S1. The spatial pattern of JE incidence in each year.
